# Supplementary material for: Synthesis and Antimicrobial Activity of Some Novel 5-Alkyl-6-Substituted Uracils and Related Derivatives
Source: MDPI journal article supplement (doi:10.3390/molecules16064764), 2011-06-08

H1 GH-34/DMSO  
MMJABAL

2

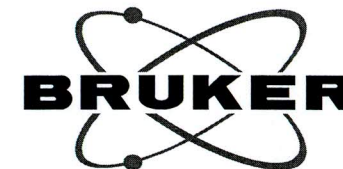

7.922  
7.428  
7.414  
7.240  
7.226  
7.194  
7.099  
7.087  
  
3.324  
3.086  
2.501  
2.246  
  
1.367  
0.841

Current Data Parameters H1 GH-34/DMSO  
NAME dremam-GH-34 MMJABAL  
EXPNO 1  
PROCNO 1

F2 - Acquisition Parameters  
Date\_ 20090616  
Time 10.52  
INSTRUM av500  
PROBHD 5 mm BBO BB-1H  
PULPROG zg30  
TD 65536  
SOLVENT DMSO  
NS 16  
DS 0  
SWH 10000.000 Hz  
FIDRES 0.152588 Hz  
AQ 3.2769001 sec  
RG 90.5  
DW 50.000 usec  
DE 6.00 usec  
TE 300.0 K  
D1 1.00000000 sec

===== CHANNEL f1 =====  
NUC1 1H  
P1 10.40 usec  
PL1 -3.00 dB  
SF01 500.1330008 MHz

F2 - Processing parameters  
SI 32768  
SF 500.1300000 MHz  
WDW EM  
SSB 0  
LB 0.30 Hz  
GB 0  
PC 1.00

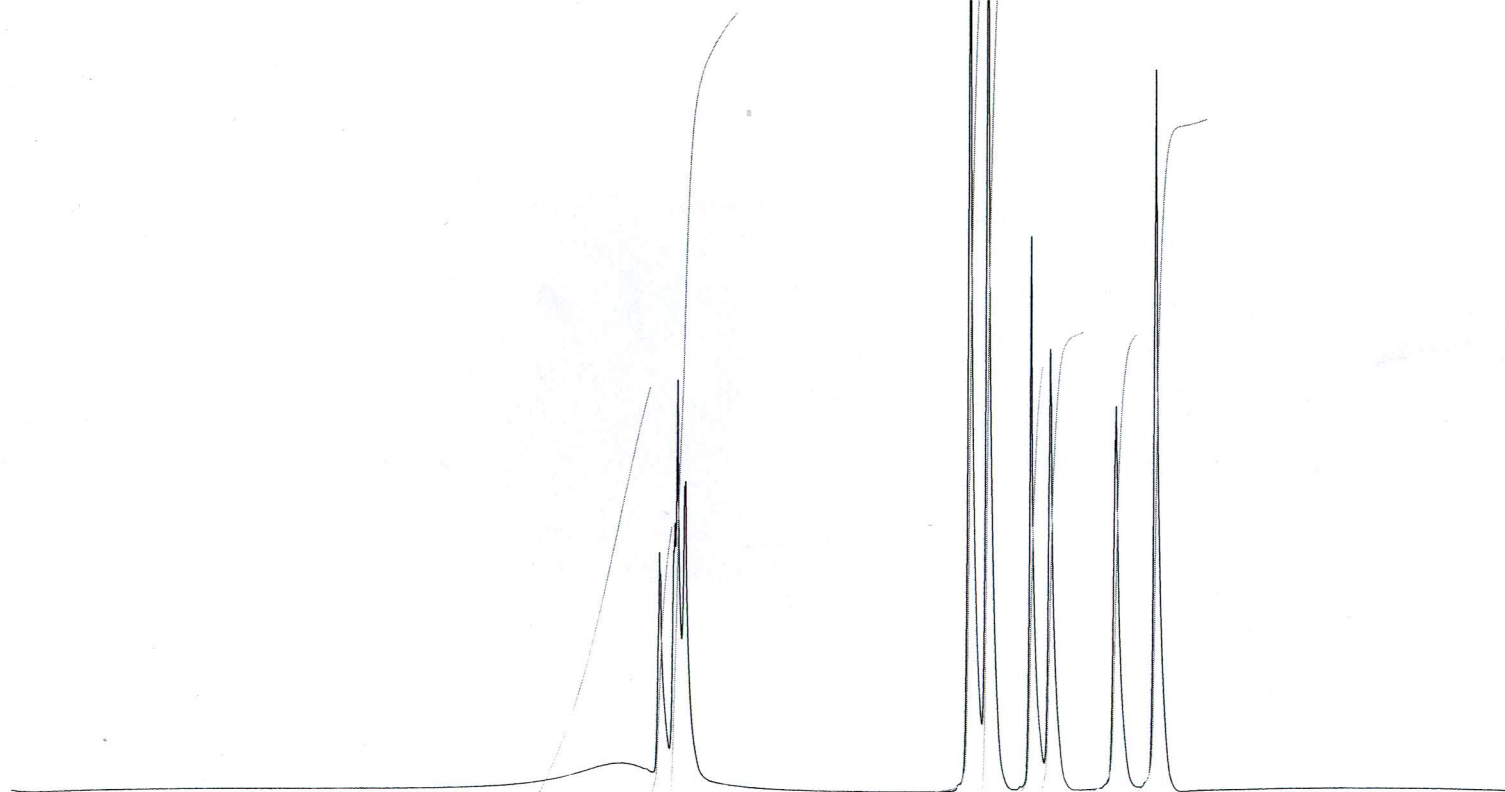

0.90  
0.59  
1.72

1.92  
1.95  
0.94  
1.01  
1.01  
1.49

15 14 13 12 11 10 9 8 7 6 5 4 3 2 1 0 -1 -2 ppm

H1 GH-34/DMSO  
MMJABAL

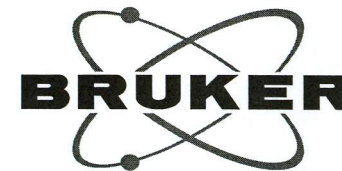

Current Data Parameters H1 GH-34/DMSO  
NAME dremam-GH-34 MMJABAL  
EXPNO 1  
PROCNO 1

F2 - Acquisition Parameters

Date\_ 20090616  
Time 10.52  
INSTRUM av500  
PROBHD 5 mm BBO BB-1H  
PULPROG zg30  
TD 65536  
SOLVENT DMSO  
NS 16  
DS 0  
SWH 10000.000 Hz  
FIDRES 0.152588 Hz  
AQ 3.2769001 sec  
RG 90.5  
DW 50.000 usec  
DE 6.00 usec  
TE 300.0 K  
D1 1.00000000 sec

===== CHANNEL f1 =====

NUC1 1H  
P1 10.40 usec  
PL1 -3.00 dB  
SFO1 500.1330008 MHz

F2 - Processing parameters

SI 32768  
SF 500.1300000 MHz  
WDW EM  
SSB 0  
LB 0.30 Hz  
GB 0  
PC 1.00

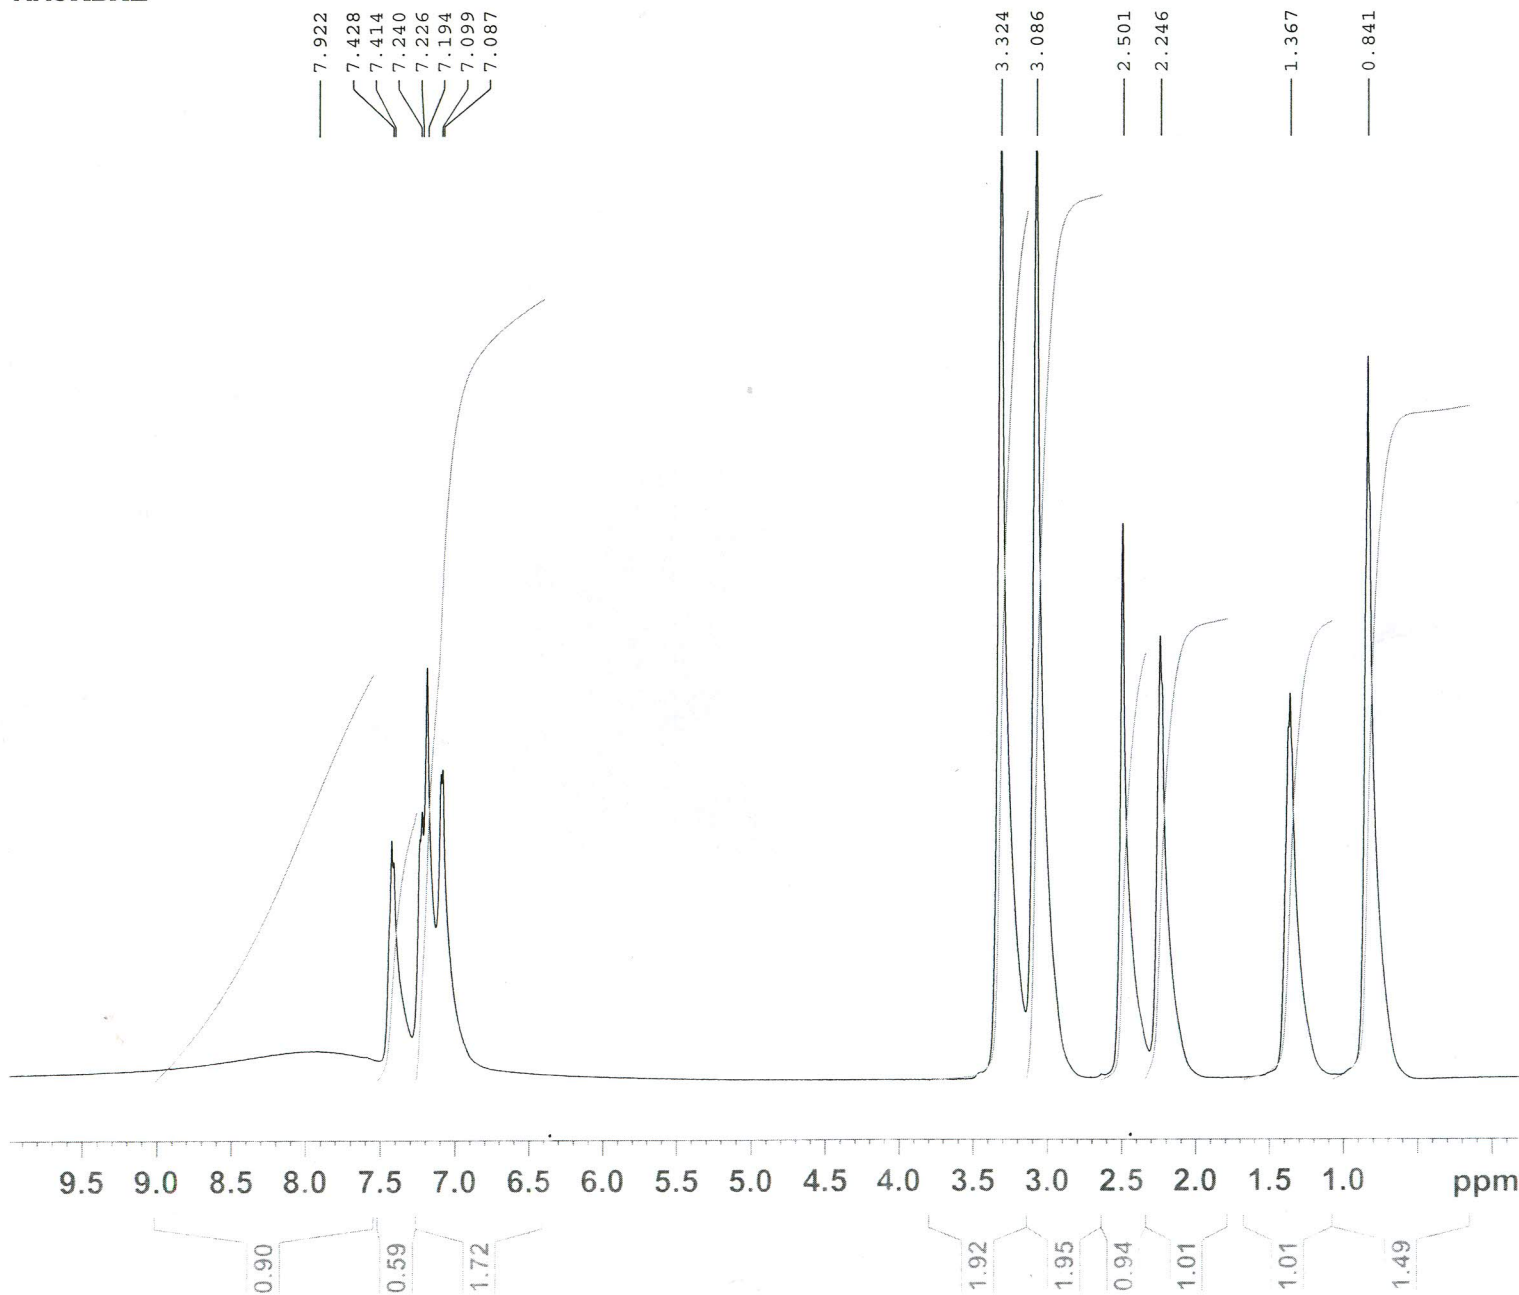

C13 GH-34/DMSO  
MMJABAL

164.70

154.14  
151.49  
150.77

130.47  
125.93  
123.74  
119.43  
115.50  
111.70  
107.16

47.19  
44.25  
40.52  
40.36  
40.19  
40.02  
39.86  
39.69  
39.53  
27.99  
21.90  
14.14

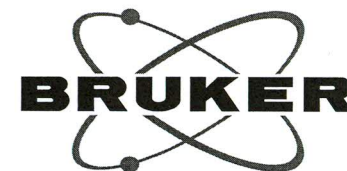

Current Data Parameters  
NAME dremam-GH-34  
EXPNO 2  
PROCNO 1

F2 - Acquisition Parameters  
Date\_ 20090616  
Time 10.56  
INSTRUM av500  
PROBHD 5 mm BBO BB-1H  
PULPROG zgpg30  
TD 65536  
SOLVENT DMSO  
NS 295  
DS 4  
SWH 27777.777 Hz  
FIDRES 0.423855 Hz  
AQ 1.1797160 sec  
RG 203.2  
DW 18.000 usec  
DE 6.00 usec  
TE 300.0 K  
D1 2.00000000 sec  
d11 0.03000000 sec  
d12 0.00002000 sec

===== CHANNEL f1 =====  
NUC1 13C  
P1 5.80 usec  
PL1 -2.00 dB  
SFO1 125.7703643 MHz

===== CHANNEL f2 =====  
CPDPRG2 waltz16  
NUC2 1H  
PCPD2 80.00 usec  
PL2 -3.00 dB  
PL12 15.00 dB  
PL13 15.00 dB  
SFO2 500.1320005 MHz

F2 - Processing parameters  
SI 32768  
SF 125.7577890 MHz  
WDW EM  
SSB 0  
LB 1.00 Hz  
GB 0  
PC 1.40

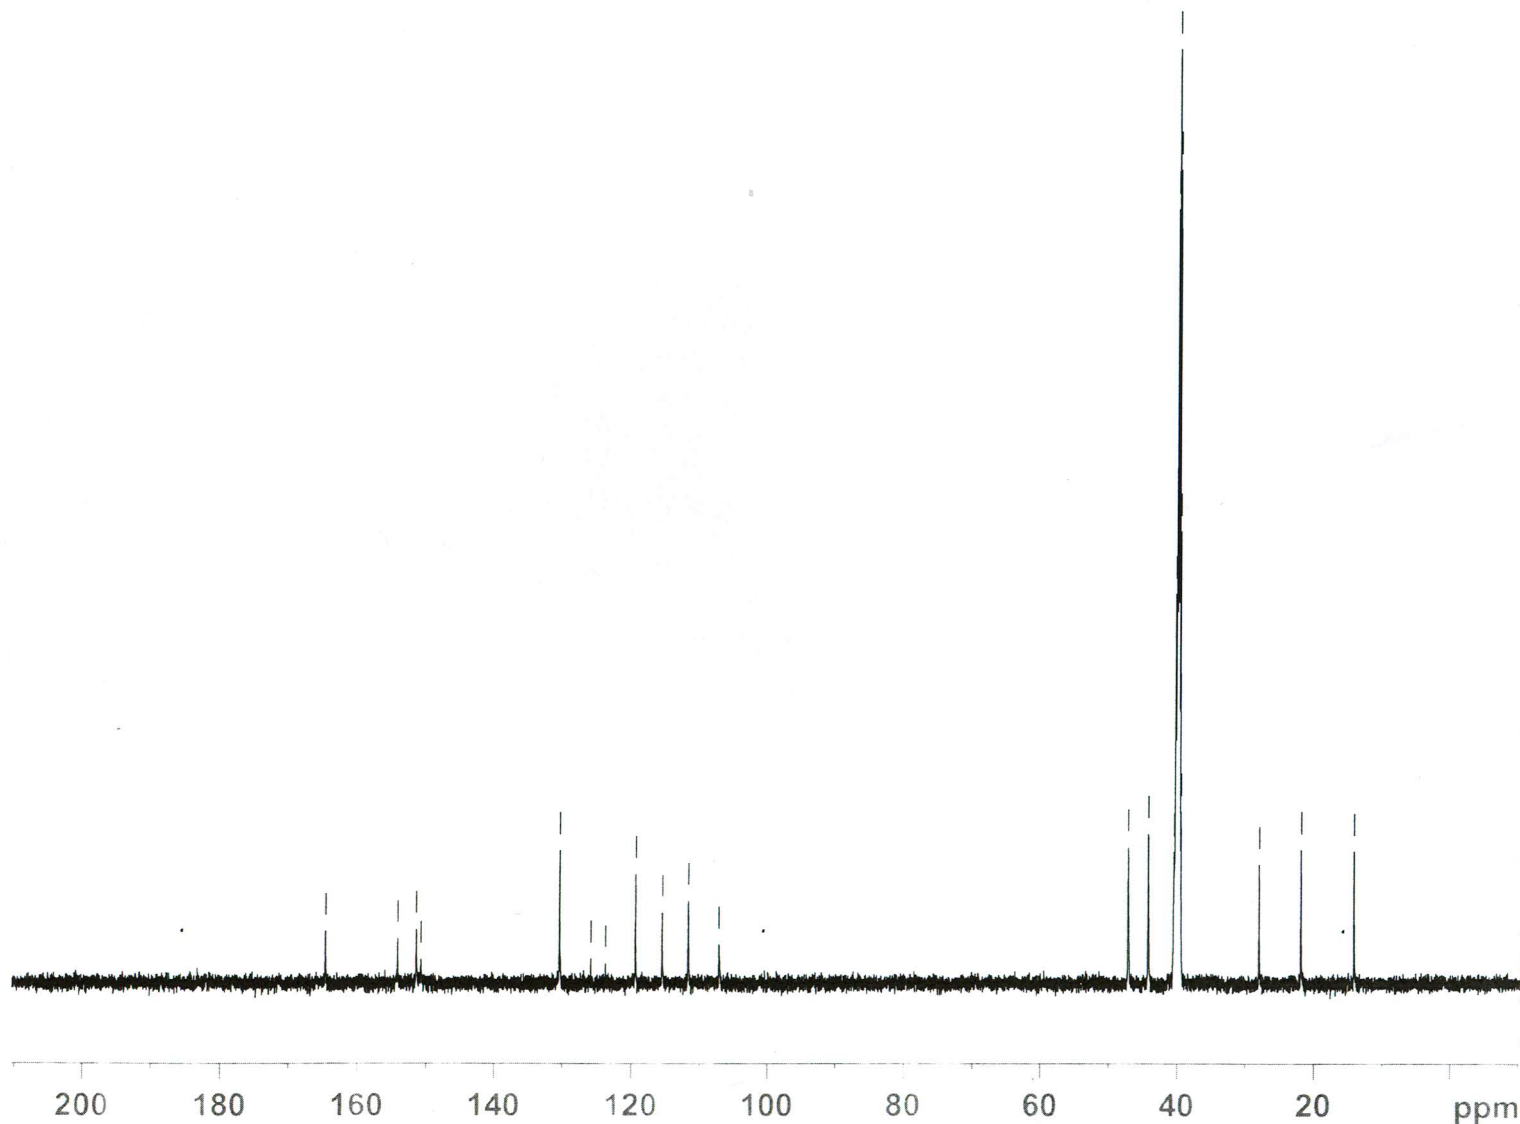

C13 GH-34/DMSO  
MMABAL

164.80  
154.14  
151.49  
150.77  
130.47  
125.93  
123.74  
119.43  
115.50  
111.70  
107.16

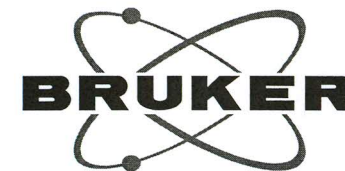

Current Data Parameters  
NAME dremam-GH-34  
EXPNO 2  
PROCNO 1

F2 - Acquisition Parameters  
Date\_ 20090616  
Time 10.56  
INSTRUM av500  
PROBHD 5 mm BBO BB-1H  
PULPROG zgpg30  
TD 65536  
SOLVENT DMSO  
NS 295  
DS 4  
SWH 27777.777 Hz  
FIDRES 0.423855 Hz  
AQ 1.1797160 sec  
RG 203.2  
DW 18.000 usec  
DE 6.00 usec  
TE 300.0 K  
D1 2.00000000 sec  
d11 0.03000000 sec  
d12 0.00002000 sec

===== CHANNEL f1 =====  
NUC1 13C  
P1 5.80 usec  
PL1 -2.00 dB  
SFO1 125.7703643 MHz

===== CHANNEL f2 =====  
CPDPRG2 waltz16  
NUC2 1H  
PCPD2 80.00 usec  
PL2 -3.00 dB  
PL12 15.00 dB  
PL13 15.00 dB  
SFO2 500.1320005 MHz

F2 - Processing parameters  
.SI 32768  
SF 125.7577890 MHz  
WDW EM  
SSB 0  
LB 1.00 Hz  
GB 0  
PC 1.40

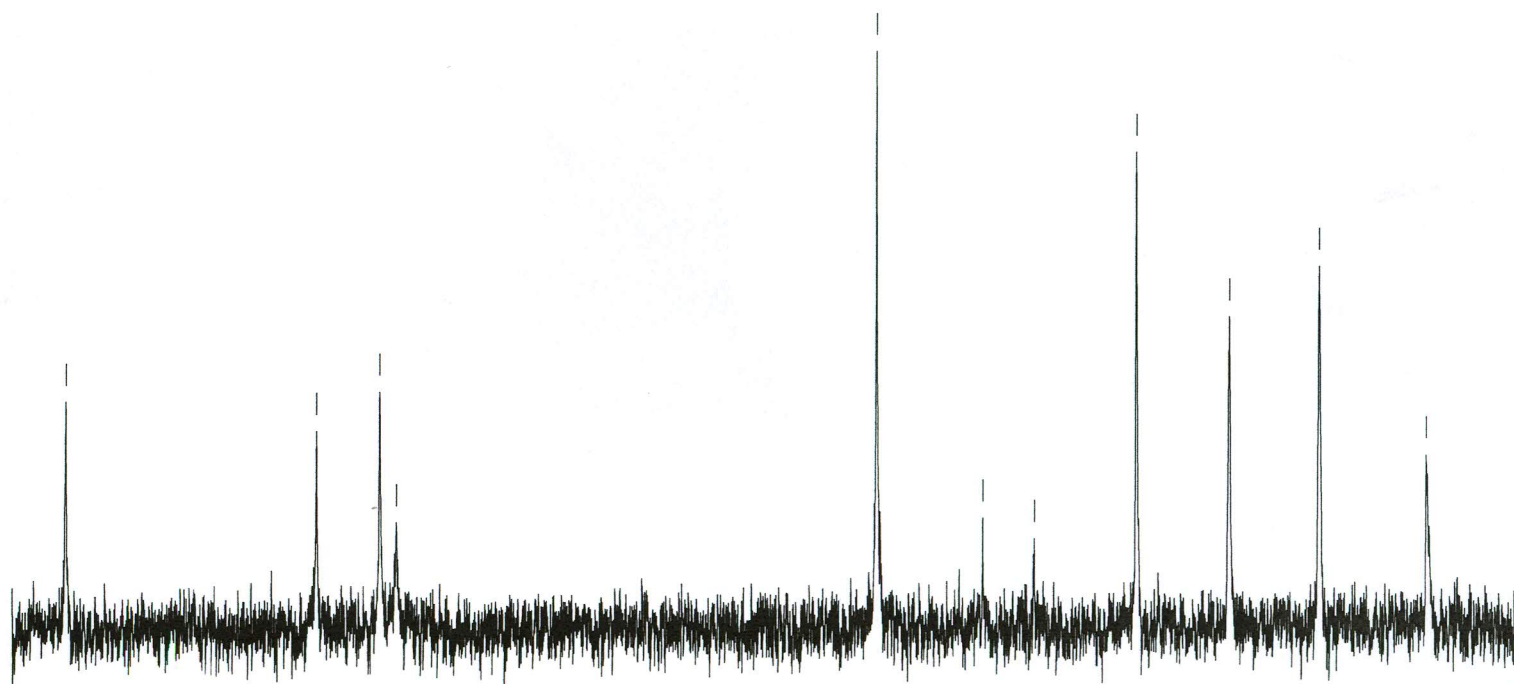

165 160 155 150 145 140 135 130 125 120 115 110 ppm

C13 GH-34/DMSO  
MMJABAL

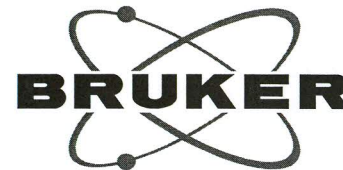

Current Data Parameters  
NAME dremam-GH-34  
EXPNO 2  
PROCNO 1

F2 - Acquisition Parameters  
Date\_ 20090616  
Time\_ 10.56  
INSTRUM av500  
PROBHD 5 mm BBO BB-1H  
PULPROG zgpg30  
TD 65536  
SOLVENT DMSO  
NS 295  
DS 4  
SWH 27777.777 Hz  
FIDRES 0.423855 Hz  
AQ 1.1797160 sec  
RG 203.2  
DW 18.000 usec  
DE 6.00 usec  
TE 300.0 K  
D1 2.00000000 sec  
d11 0.03000000 sec  
d12 0.00002000 sec

===== CHANNEL f1 =====  
NUC1 13C  
P1 5.80 usec  
PL1 -2.00 dB  
SFO1 125.7703643 MHz

===== CHANNEL f2 =====  
CPDPRG2 waltz16  
NUC2 1H  
PCPD2 80.00 usec  
PL2 -3.00 dB  
PL12 15.00 dB  
PL13 15.00 dB  
SFO2 500.1320005 MHz

F2 - Processing parameters  
SI 32768  
SF 125.7577890 MHz  
WDW EM  
SSB 0  
LB 1.00 Hz  
GB 0  
PC 1.40

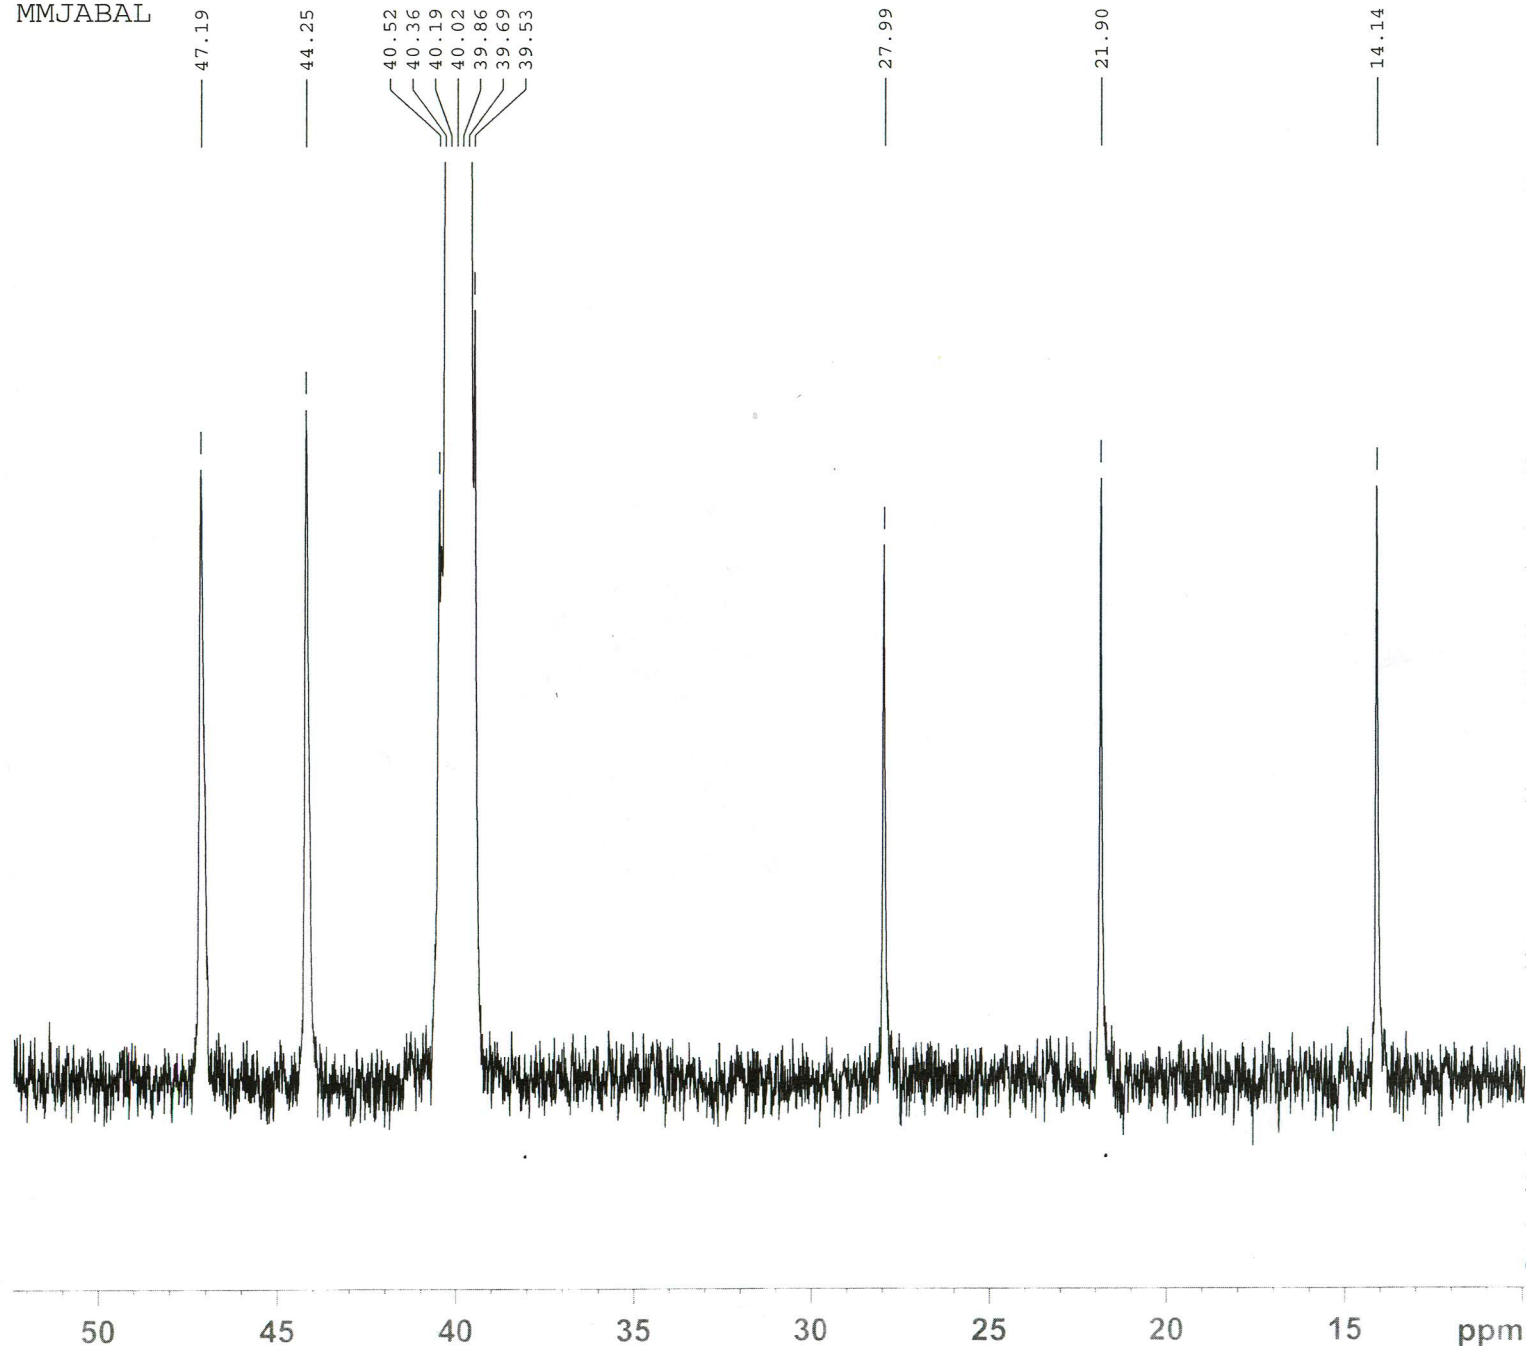

Supplement: s1 [file s1]
