# Supplementary material for: Synthesis and Antimicrobial Activity of Some Novel 5-Alkyl-6-Substituted Uracils and Related Derivatives
Source: MDPI journal article supplement (doi:10.3390/molecules16064764), 2011-06-08

H1 PY-3/DMSO  
MMJABAL

11.817  
11.318

2.511  
2.508  
2.505  
2.329  
2.314  
2.300  
2.285  
0.978  
0.964  
0.949

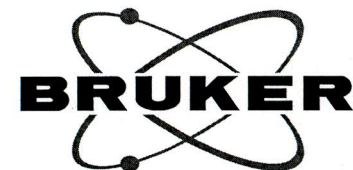

Current Data Parameters H1 PY-3/DMSO  
NAME drelemam-PY-3 MMJABAL  
EXPNO 1  
PROCNO 1

F2 - Acquisition Parameters  
Date\_ 20040512  
Time 9.08  
INSTRUM av500  
PROBHD 5 mm BBO BB-1H  
PULPROG zg30  
TD 65536  
SOLVENT DMSO  
NS 16  
DS 0  
SWH 10000.000 Hz  
FIDRES 0.152588 Hz  
AQ 3.2769001 sec  
RG 161.3  
DW 50.000 usec  
DE 6.00 usec  
TE 300.0 K  
D1 1.00000000 sec

===== CHANNEL f1 =====  
NUC1 1H  
P1 10.40 usec  
PL1 -3.00 dB  
SFO1 500.1330008 MHz

F2 - Processing parameters  
SI 32768  
SF 500.1300000 MHz  
WDW EM  
SSB 0  
LB 0.30 Hz  
GB 0  
PC 1.40

15 14 13 12 11 10 9 8 7 6 5 4 3 2 1 0 -1 -2 ppm

1.00  
1.01

0.34  
2.44  
2.09  
3.12

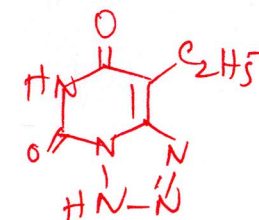

H1 PY-3/DMSO

MMJABAL

2.328  
2.314  
2.300  
2.285

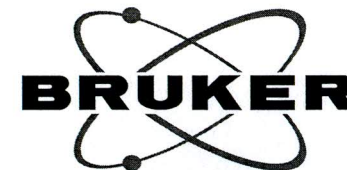

Current Data Parameters H1 PY-3/DMSO  
NAME drelemam-PY-3 MMJABAL  
EXPNO 1  
PROCNO 1

F2 - Acquisition Parameters

Date\_ 20040512  
Time 9.08  
INSTRUM av500  
PROBHD 5 mm BBO BB-1H  
PULPROG zg30  
TD 65536  
SOLVENT DMSO  
NS 16  
DS 0  
SWH 10000.000 Hz  
FIDRES 0.152588 Hz  
AQ 3.2769001 sec  
RG 161.3  
DW 50.000 usec  
DE 6.00 usec  
TE 300.0 K  
D1 1.00000000 sec

===== CHANNEL f1 =====

NUC1 1H  
P1 10.40 usec  
PL1 -3.00 dB  
SFO1 500.1330008 MHz

F2 - Processing parameters

SI 32768  
SF 500.1300000 MHz  
WDW EM  
SSB 0  
LB 0.30 Hz  
GB 0  
PC 1.40

2.4 2.3 2.2 2.1 2.0 1.9 1.8 1.7 1.6 1.5 1.4 1.3 1.2 1.1 1.0 ppm

2.09

3.12

C13 PY-3/DMSO  
MMJABAL

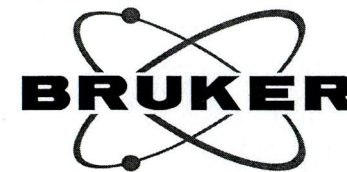

Current Data Parameters  
NAME drelemam-PY-3  
EXPNO 2  
PROCNO 1

F2 - Acquisition Parameters  
Date\_ 20040512  
Time 9.43  
INSTRUM av500  
PROBHD 5 mm BBO BB-1H  
PULPROG zgpg30  
TD 65536  
SOLVENT DMSO  
NS 636  
DS 4  
SWH 27777.777 Hz  
FIDRES 0.423855 Hz  
AQ 1.1797160 sec  
RG 812.7  
DW 18.000 usec  
DE 6.00 usec  
TE 300.0 K  
D1 2.00000000 sec  
d11 0.03000000 sec  
d12 0.00002000 sec

===== CHANNEL f1 =====  
NUC1 13C  
P1 5.80 usec  
PL1 -2.00 dB  
SFO1 125.7703643 MHz

===== CHANNEL f2 =====  
CPDPRG2 waltz16  
NUC2 1H  
PCPD2 80.00 usec  
PL2 -3.00 dB  
PL12 15.00 dB  
PL13 15.00 dB  
SFO2 500.1320005 MHz

F2 - Processing parameters  
SI 32768  
SF 125.7577890 MHz  
WDW EM  
SSB 0  
LB 1.00 Hz  
GB 0  
PC 1.00

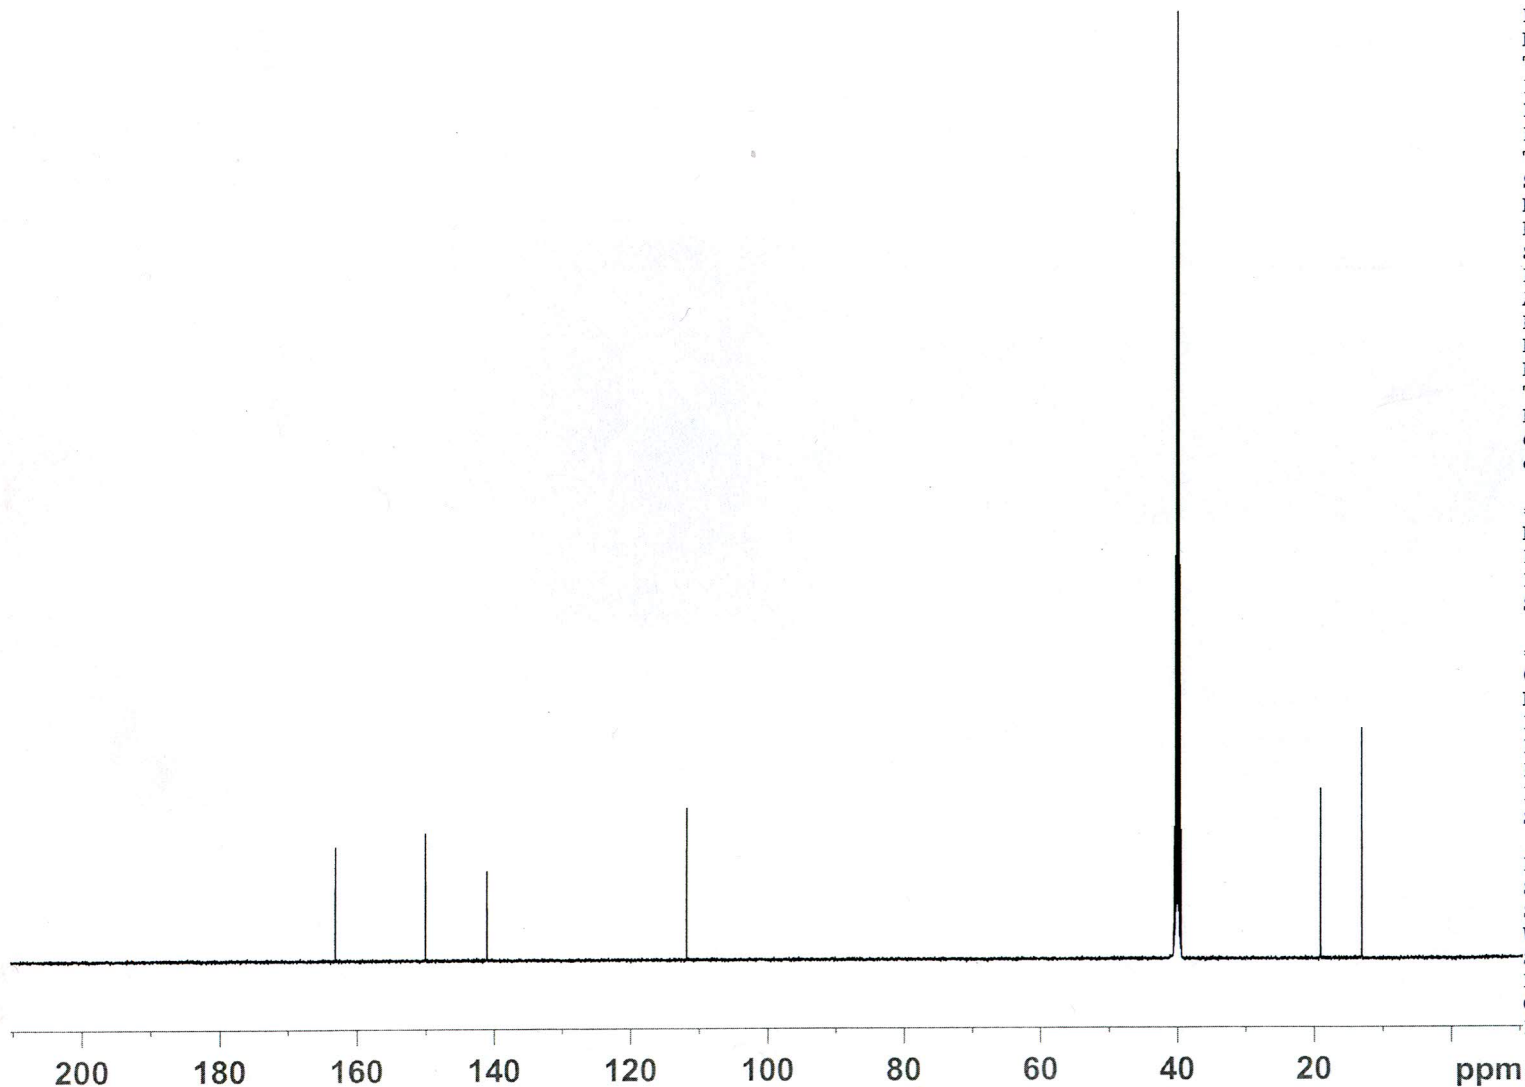

Supplement: s1 [file s1]
