# Supplementary material for: Synthesis and Antimicrobial Activity of Some Novel 5-Alkyl-6-Substituted Uracils and Related Derivatives
Source: MDPI journal article supplement (doi:10.3390/molecules16064764), 2011-06-08
Supplement: s1 [file s1]

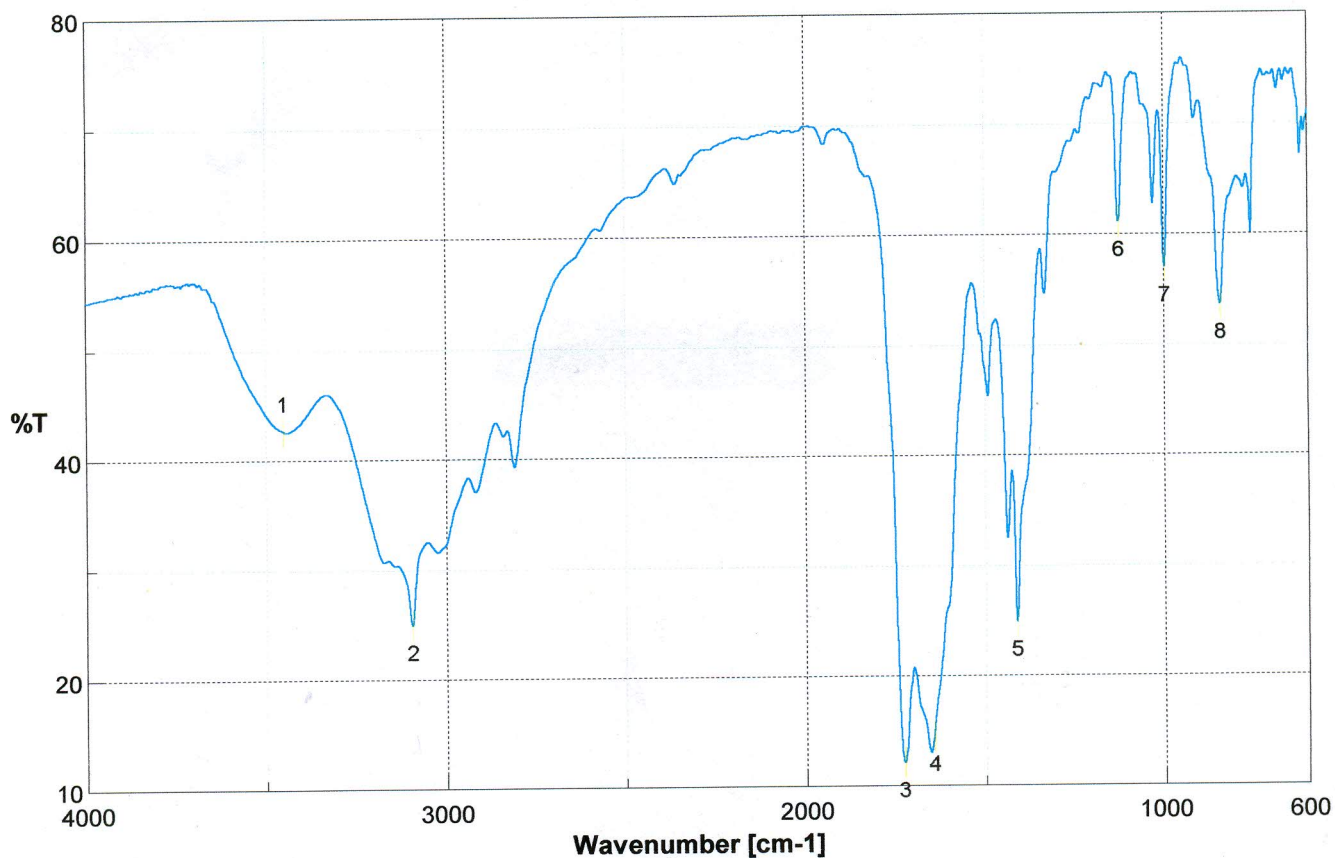

|                |                           |
|----------------|---------------------------|
| Accumulation   | Auto (20 )                |
| Resolution     | 4 cm-1                    |
| Zero Filling   | ON                        |
| Apodization    | Cosine                    |
| Gain           | Auto (2)                  |
| Scanning Speed | Auto (2 mm/sec)           |
| Date/Time      | 3/3/04 9:57AM             |
| Update         | 3/3/04 10:01AM            |
| Operator       | hasson                    |
| File Name      | Dr. Ali -8.jws            |
| Sample Name    | Polystyrene               |
| Comment        | tesr air as sample17dec03 |

| No. | cm-1    | %T      | No. | cm-1    | %T      | No. | cm-1    | %T      |
|-----|---------|---------|-----|---------|---------|-----|---------|---------|
| 1   | 3451.96 | 42.6307 | 2   | 3095.19 | 24.932  | 3   | 1727.91 | 12.1387 |
| 4   | 1645.95 | 14.5281 | 5   | 1412.6  | 24.9005 | 6   | 1126.22 | 61.0959 |
| 7   | 998.946 | 56.9483 | 8   | 843.704 | 53.5911 |     |         |         |

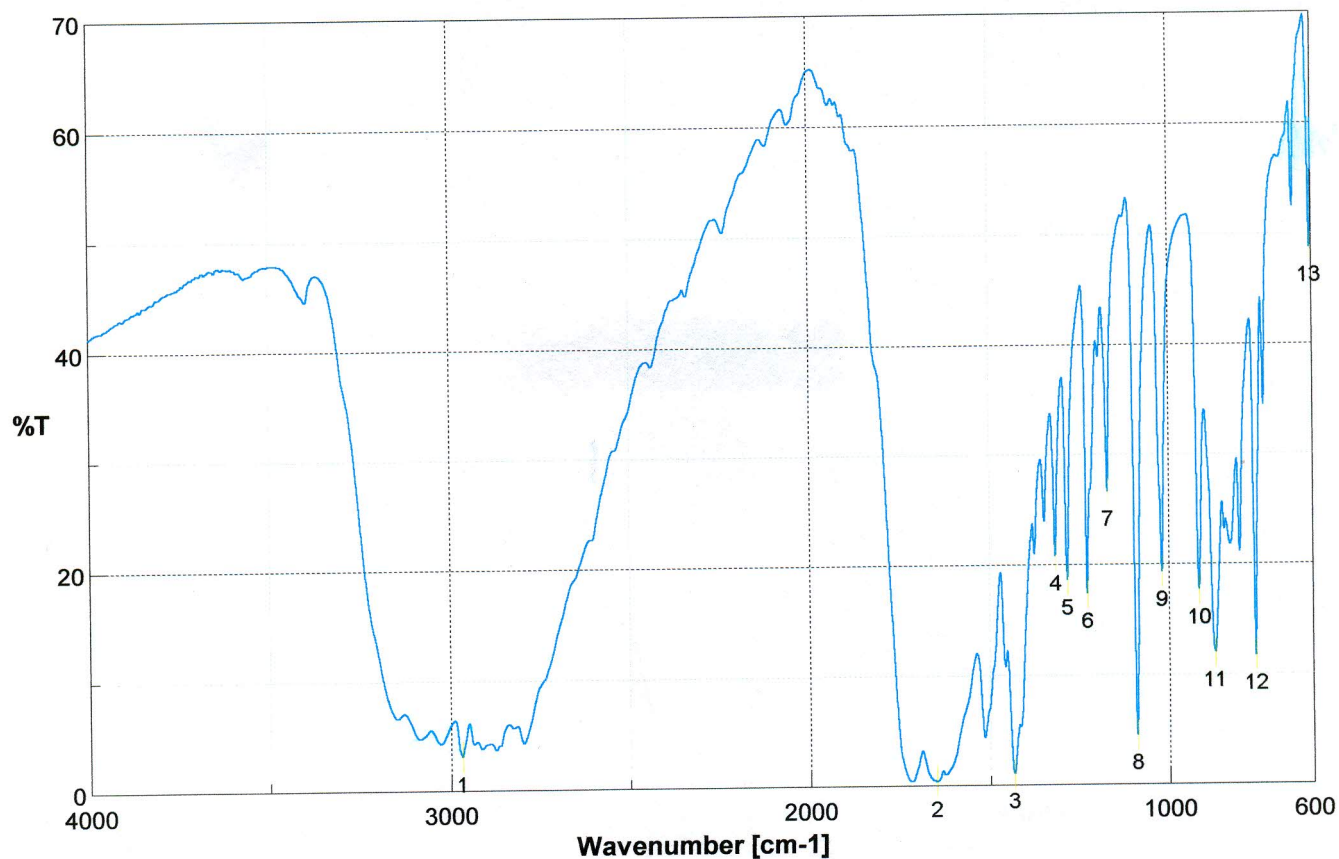

Accumulation Auto (32 )  
 Resolution 4 cm-1  
 Zero Filling ON  
 Apodization Cosine  
 Gain Auto (2)  
 Scanning Speed Auto (2 mm/sec)  
 Date/Time 3/2/04 3:30PM  
 Update 3/2/04 3:32PM  
 Operator hasson  
 File Name Dr. Ali -4.jws  
 Sample Name Polystyrene  
 Comment tesr air as sample17dec03

| No. | cm-1    | %T      | No. | cm-1    | %T      | No. | cm-1    | %T      |
|-----|---------|---------|-----|---------|---------|-----|---------|---------|
| 1   | 2967.91 | 3.15878 | 2   | 1650.77 | 0.41283 | 3   | 1433.82 | 1.11826 |
| 4   | 1317.14 | 20.8569 | 5   | 1283.39 | 18.6443 | 6   | 1228.43 | 17.4094 |
| 7   | 1171.54 | 26.6493 | 8   | 1090.55 | 4.5118  | 9   | 1020.16 | 19.3398 |
| 10  | 916.986 | 17.6609 | 11  | 873.596 | 11.9985 | 12  | 759.816 | 11.7136 |
| 13  | 604.574 | 48.681  |     |         |         |     |         |         |

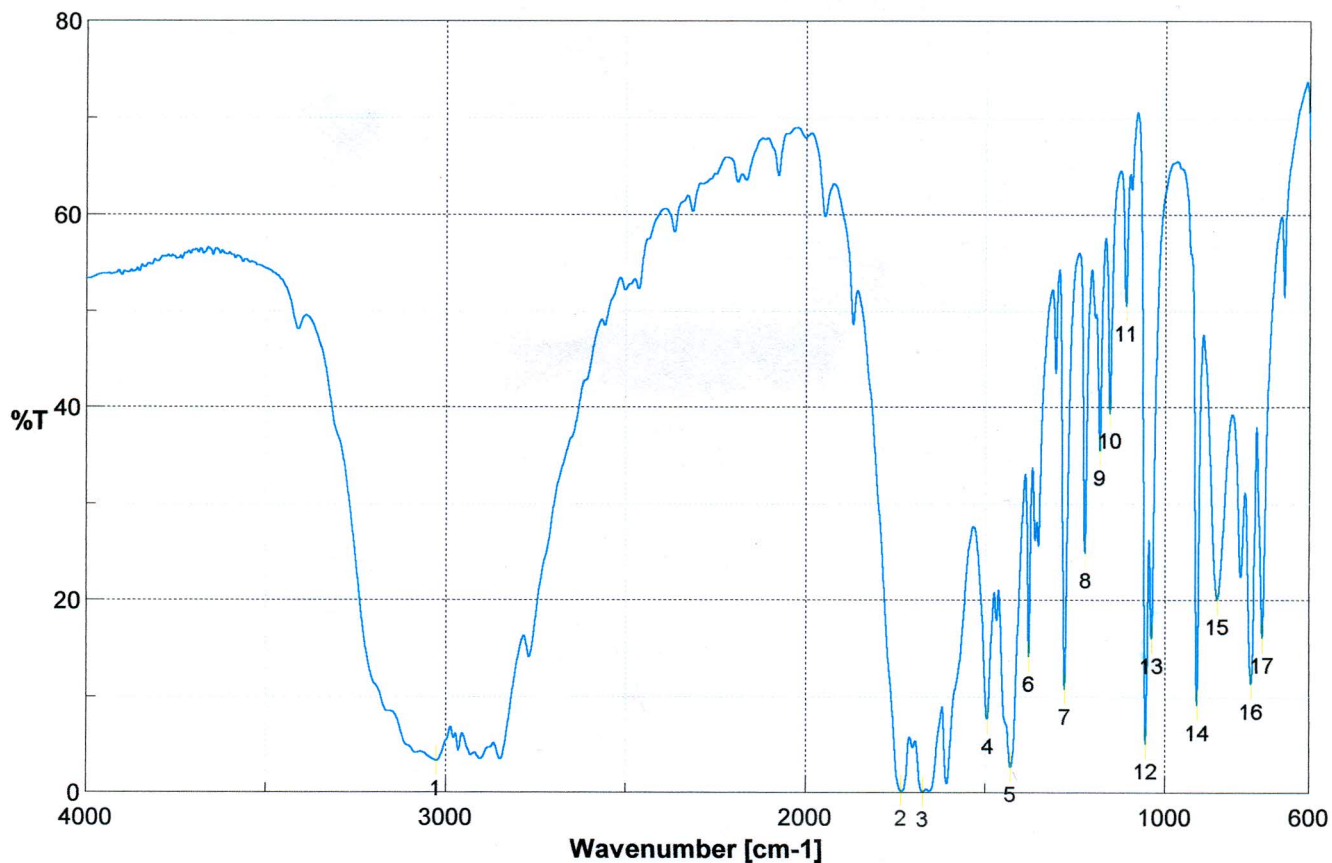

Accumulation Auto (27 )  
 Resolution 4 cm-1  
 Zero Filling ON  
 Apodization Cosine  
 Gain Auto (2)  
 Scanning Speed Auto (2 mm/sec)  
 Date/Time 3/2/04 3:42PM  
 Update 3/2/04 3:45PM  
 Operator hasson  
 File Name Dr. Ali -5.jws  
 Sample Name Polystyrene  
 Comment tesr air as sample17dec03

| No. | cm-1    | %T      | No. | cm-1    | %T       | No. | cm-1    | %T       |
|-----|---------|---------|-----|---------|----------|-----|---------|----------|
| 1   | 3026.73 | 3.34664 | 2   | 1733.69 | 0.233476 | 3   | 1672.95 | 0.119702 |
| 4   | 1495.53 | 7.71553 | 5   | 1429.96 | 2.72046  | 6   | 1379.82 | 14.1961  |
| 7   | 1280.5  | 10.7766 | 8   | 1223.61 | 24.861   | 9   | 1183.11 | 35.4988  |
| 10  | 1155.15 | 39.3594 | 11  | 1109.83 | 50.5252  | 12  | 1054.87 | 5.10382  |
| 13  | 1038.48 | 15.9996 | 14  | 912.165 | 9.13084  | 15  | 856.239 | 20.1161  |
| 16  | 761.744 | 11.2871 | 17  | 729.925 | 16.1054  |     |         |          |
